# Supplementary material for: Antimicrobial Resistance and Genomic Characterization of Campylobacter jejuni and Campylobacter coli Isolated from Retail Chickens in Beijing, China
Source: MDPI journal article supplement (doi:10.3390/microorganisms12081601), 2024-08-06
Supplement: s1 [file s1]

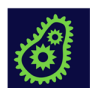

## Article

# Antimicrobial Resistance and Genomic Characterization of *Campylobacter jejuni* and *Campylobacter coli* Isolated from Retail Chickens in Beijing, China

Yao Bai <sup>1,†</sup>, Jiaqi Ma <sup>2,†</sup>, Fengqin Li <sup>1</sup>, Baowei Yang <sup>2</sup>, Xiu Ren <sup>3</sup>, Yeru Wang <sup>1</sup>, Yujie Hu <sup>1</sup>, Yinping Dong <sup>1</sup>, Wei Wang <sup>1</sup>, Jing Zhang <sup>1</sup>, Shaofei Yan <sup>1,\*</sup> and Shenghui Cui <sup>3,\*</sup>

<sup>1</sup> NHC Key Laboratory of Food Safety Risk Assessment, China National Centre for Food Safety Risk Assessment, Beijing 100022, China; baiyao@cfsa.net.cn (Y.B.)

<sup>2</sup> College of Food Science and Engineering, Northwest Agriculture and Forestry Science and Technology University, Shaanxi 712100, China; mj1531900880@nwfau.edu.cn (J.M.)

<sup>3</sup> National Institutes for Food and Drug Control, Beijing 100050, China

\* Correspondence: yanshaofei@cfsa.net.cn (S.Y.); cuishenghui@aliyun.com (S.C.); Tel.: +86-10-52165596 (S.Y.); +86-10-67095601 (S.C.)

† The two authors contributed equally to this study.

## Supplementary Materials

**Table S1.** Relationship between Susceptibility/resistance Patterns and Associated Antibiotic Resistance Genes and point mutations in *C. coli* isolates.

|                              | GEN         |         | ERY         |         | CHL                 |         | DC         |         | TET         |         |
|------------------------------|-------------|---------|-------------|---------|---------------------|---------|------------|---------|-------------|---------|
|                              | OR          | p-value | OR          | p-value | OR                  | p-value | OR         | p-value | OR          | p-value |
| <i>aac(6')-aph(2'')</i>      | 1.0118E+26  | 0.999   | 4568241710  | 1       | 3.299               | 1       | 2.1625E+27 | 0.999   | 1.2584E+17  | 0.999   |
| <i>aadE-Cc</i>               | 3795044.065 | 1       | 1989693.387 | 1       | 0                   | 0.999   | 0.914      | 1       | 323094968.6 | 0.999   |
| <i>ant(6)-Ia</i>             | 54861221.88 | 1       | 2.3834E+15  | 0.999   | 75297861.22         | 1       | 114224890  | 1       | 0.754       | 1       |
| <i>aph(2'')-If</i>           | 0           | 0.998   | 0.635       | 0.784   | 0                   | 0.999   | 0          | 0.999   | 0           | 0.999   |
| <i>aph(3')-III</i>           | 0           | 0.999   | 0           | 0.998   | 0                   | 0.998   | 0          | 0.998   | 0.371       | 1       |
| <i>erm(B)</i>                | 0           | 0.999   | 70646893.47 | 0.998   | 0                   | 0.999   | 0          | 0.999   | 0           | 0.999   |
| <i>cat</i>                   | 871838322.8 | 0.999   | 3.821       | 0.423   | 1.2931E+17          | 0.998   | 0          | 0.999   | 0           | 0.999   |
| <i>fexA</i>                  | 0           | 1       | 0           | 1       | 1014835424          | 1       | 0.243      | 1       | 560937444.5 | 1       |
| <i>tet(L)</i>                | 0           | 1       | 0           | 1       | 1014835424          | 1       | 0.243      | 1       | 560937444.5 | 1       |
| <i>tet(O)</i>                | 0           | 0.999   | 0           | 0.999   | 10.727 <sup>a</sup> | 0.024   | 1.871      | 0.502   |             |         |
| <i>bla<sub>OXA-193</sub></i> | 0           | 0.999   | 0           | 0.998   | 0                   | 1       | 0          | 0.998   | 0           | 0.999   |
| <i>bla<sub>OXA-489</sub></i> | 0           | 0.999   | 0           | 0.999   | 27760879868         | 1       | 0          | 0.999   | 0           | 0.999   |
| <i>RpsL (K43R)</i>           | 0           | 1       | 180416521.8 | 1       | 3.598               | 1       | 2.157      | 1       | 2.074       | 1       |
| <i>23S (A2075G)</i>          | 0           | 0.999   | 0           | 0.999   | 0                   | 0.999   | 0          | 0.999   | 0           | 1       |
| <i>L4 V121A</i>              | 632801535.5 | 0.999   | 272171667.3 | 0.999   | 0.428               | 1       | 2.666      | 1       | 1.44        | 1       |
| <i>L4 M192I</i>              | 0           | 0.999   | 0           | 0.999   | 27760879868         | 1       | 0          | 0.999   | 0           | 0.999   |

GEN: gentamicin, ERY: erythromycin, CHL: chloramphenicol, DC: doxycycline, TET: tetracycline, OR: Odds ratio <sup>a</sup> Indicates an association between antibiotics resistance and the associated-antibiotic resistance gene. <sup>b</sup> Indicates an association between antimicrobial susceptibility and the associated-antibiotic resistance gene. Antimicrobial resistance is defined as an OR > 1 and *p* < 0.05, and antimicrobial susceptibility is defined as an OR < 1 and *p* < 0.05.

**Table S2.** Relationship between Susceptibility/resistance Patterns and Associated Antibiotic Resistance Genes and point mutations in *C. jejuni* isolates.

|                              | GEN                 |         | ERY                 |         | CHL                |         | CIP               |         | DC              |         | TET             |         |
|------------------------------|---------------------|---------|---------------------|---------|--------------------|---------|-------------------|---------|-----------------|---------|-----------------|---------|
|                              | OR                  | p-value | OR                  | p-value | OR                 | p-value | OR                | p-value | OR              | p-value | OR              | p-value |
| <i>ant(6)-Ia</i>             | 1.792               | 1       | 4.386               | 1       | 1.968              | 1       | 0                 | 0.999   | 0.888           | 1       | 0.001           | 1       |
| <i>aph(2'')-If</i>           | 1.0137E+1<br>6      | 0.998   | 52.495 <sup>a</sup> | 0.023   | 1.7113E+1<br>6     | 0.998   | 0.276             | 1       | 0               | 0.999   | 7.609           | 1       |
| <i>aph(3')-III</i>           | 16.812              | 1       | 16731979.<br>27     | 0.999   | 16.376             | 1       | 247665265.0<br>71 | 1       | 4.313           | 1       | 0               | 1       |
| <i>cat</i>                   | 16.812              | 1       | 16731979.<br>27     | 0.999   | 16.376             | 1       | 247665265.0<br>71 | 1       | 4.313           | 1       | 0               | 1       |
| <i>tet(O)</i>                | 0.46                | 0.455   | 20.541 <sup>a</sup> | 0.026   | 0.503              | 0.445   | 0                 | 0.999   | 0.705           | 0.653   | 1.5268E+1<br>5  | 0.997   |
| <i>bla<sub>OXA-184</sub></i> | 11.428              | 1       | 133379917<br>.5     | 1       | 11.395             | 1       | 5.2048E+17        | 0.999   | 4.995           | 1       | 0.173           | 1       |
| <i>bla<sub>OXA-185</sub></i> | 0.288               | 1       | 0                   | 1       | 0.516              | 1       | 31610E+10         | 1       | 0               | 0.999   | 0               | 1       |
| <i>bla<sub>OXA-193</sub></i> | 207840075<br>.4     | 1       | 107056993<br>7      | 1       | 365844883<br>.9    | 1       | 2.100E+10         | 1       | 127772821<br>4  | 1       | 1134099.4<br>46 | 1       |
| <i>bla<sub>OXA-465</sub></i> | 1.121               | 1       | 0.459               | 1       | 2.02               | 1       | 0                 | 1       | 0               | 0.999   | 0               | 1       |
| <i>RpsL</i><br>(K43R)        | 0                   | 1       | 0                   | 0.999   | 0                  | 1       | 1.856             | 1       | 6.342           | 0.301   | 0               | 0.999   |
| <i>L4 V82I</i>               | 0                   | 0.999   | 0                   | 0.999   | 0                  | 0.999   | 0                 | 0.999   | 204249910<br>0  | 0.999   | 0               | 0.999   |
| <i>L4 T91K</i>               | 0                   | 1       | 0                   | 1       | 0                  | 1       | 0                 | 1       | 0               | 0.998   | 0               | 0.999   |
| <i>L4 V121A</i>              | 2.591               | 0.5     | 0.453               | 0.537   | 1.472              | 0.772   | 242392669.4<br>37 | 0.999   | 988041491<br>.1 | 0.999   | 11368174.<br>31 | 1       |
| <i>L4 V176I</i>              | 0                   | 1       | 0                   | 1       | 0                  | 1       | 0                 | 1       | 0               | 0.998   | 0               | 0.999   |
| <i>L4 T177S</i>              | 0                   | 1       | 0                   | 1       | 0                  | 1       | 0                 | 1       | 0               | 0.998   | 0               | 0.999   |
| <i>L4 M192I</i>              | 10.333 <sup>a</sup> | 0.001   | 2.019               | 0.253   | 8.286 <sup>a</sup> | 0.03    | 2.585             | 0.697   | 0.636           | 0.458   | 2.270           | 0.466   |
| <i>GyrA</i><br>(S22G)        | 0.19                | 0.282   | 0.113               | 0.247   | 0.319              | 0.45    | 0                 | 0.999   | 0               | 0.998   | 0               | 0.999   |
| <i>GyrA</i><br>(T86I)        | 133694456<br>7      | 0.999   | 979075588<br>.4     | 0.999   | 155564243<br>3     | 0.999   | 1236642433        | 1       | 0.207           | 0.171   | 4.0700E-09      | 0.999   |

GEN: gentamicin, ERY: erythromycin, CHL: chloramphenicol, CIP: ciprofloxacin, DC: doxycycline, TET: tetracycline, OR: Odds ratio <sup>a</sup> Indicates an association between antibiotics resistance and the associated-antibiotic resistance gene. <sup>b</sup> Indicates an association between antimicrobial susceptibility and the associated-antibiotic resistance gene. Antimicrobial resistance is defined as an OR > 1 and *p* < 0.05, and antimicrobial susceptibility is defined as an OR < 1 and *p* < 0.05.

**Table S3.** Relationship between Susceptibility/resistance Patterns and Associated Virulence Genes in *C. coli* isolates.

|               | GEN               |         | ERY                |         | CHL                |         | DC                 |         | TET         |         |
|---------------|-------------------|---------|--------------------|---------|--------------------|---------|--------------------|---------|-------------|---------|
|               | OR                | p-value | OR                 | p-value | OR                 | p-value | OR                 | p-value | OR          | p-value |
| <i>cheA</i>   | 756362537.1       | 1       | 1150324865         | 1       | 323618950.7        | 1       | 1263792058         | 1       | 0           | 1       |
| <i>Cj1135</i> | 1.017             | 0.982   | 0.251              | 0.166   | 0.897              | 0.88    | 0.037 <sup>b</sup> | 0.001   | 0.547       | 0.514   |
| <i>htrB</i>   | 2.341             | 0.602   | 0.053              | 0.094   | 1.986              | 0.643   | 9.017              | 0.153   | 180178356.7 | 0.999   |
| <i>kpsM</i>   | 0.09 <sup>b</sup> | 0.002   | 0.098 <sup>b</sup> | 0.003   | 0.167 <sup>b</sup> | 0.035   | 0.307              | 0.102   | 2.279       | 0.472   |
| <i>flaA</i>   | 0                 | 1       | 0                  | 1       | 0                  | 1       | 0                  | 1       | 0           | 1       |
| <i>flaB</i>   | 311040269.3       | 1       | 221852055.5        | 1       | 1343515266         | 1       | 633182942.5        | 1       | 322034793.9 | 1       |

GEN: gentamicin, ERY: erythromycin, CHL: chloramphenicol, DC: doxycycline, TET: tetracycline, OR: Odds ratio <sup>a</sup> Indicates an association between antibiotics resistance and the associated-virulence

gene. <sup>b</sup> Indicates an association between antimicrobial susceptibility and the associated-virulence gene. Antimicrobial resistance is defined as an OR > 1 and  $p < 0.05$ , and antimicrobial susceptibility is defined as an OR < 1 and  $p < 0.05$ .

**Table S4.** Relationship between Susceptibility/resistance Patterns and Associated Virulence genes in *C. jejuni* isolates.

|               | GEN                |                 | ERY                 |                 | CHL            |                 | CIP              |                   | DC             |                 | TET                 |                 |
|---------------|--------------------|-----------------|---------------------|-----------------|----------------|-----------------|------------------|-------------------|----------------|-----------------|---------------------|-----------------|
|               | OR                 | <i>p</i> -value | OR                  | <i>p</i> -value | OR             | <i>p</i> -value | OR               | <i>p</i> -value   | OR             | <i>p</i> -value | OR                  | <i>p</i> -value |
| <i>porA</i>   | 0.41               | 0.208           | 0.296               | 0.142           | 0.412          | 0.196           | 3.942            | 0.216             | 0.832          | 0.777           | 0.227               | 0.226           |
| <i>Cj1135</i> | 5.139 <sup>a</sup> | 0.036           | 23.801 <sup>a</sup> | 0.009           | 2.659          | 0.156           | 13.316           | 0.38 <sup>a</sup> | 1.345          | 0.636           | 10.214 <sup>a</sup> | 0.017           |
| <i>kpsM</i>   | 0.942              | 1               | 258777806<br>7      | 1               | 0.703          | 1               | 0.532            | 1                 | 162005081<br>4 | 1               | 1.91                | 1               |
| <i>NeuA1</i>  | 0.843              | 0.909           | 0.818               | 0.905           | 0.814          | 0.889           | 93267465.85      | 0.999             | 153139466<br>9 | 0.999           | 87609726.9<br>3     | 0.999           |
| <i>wlaN</i>   | 0.843              | 0.909           | 0.818               | 0.905           | 0.814          | 0.889           | 93267465.85      | 0.999             | 153139466<br>9 | 0.999           | 87609726.9<br>3     | 0.999           |
| <i>flaA</i>   | 1.129              | 0.838           | 0.39                | 0.154           | 2.214          | 0.171           | 6.430            | 0.136             | 0.994          | 0.992           | 0.338               | 0.263           |
| <i>flaB</i>   | 1.129              | 0.838           | 0.39                | 0.154           | 2.214          | 0.171           | 6.430            | 0.136             | 0.994          | 0.992           | 0.338               | 0.263           |
| <i>cdtA</i>   | 0                  | 0.999           | 0.665               | 0.787           | 0              | 0.999           | 0                | 0.999             | 0.965          | 0.98            | 0                   | 0.999           |
| <i>cdtB</i>   | 2.4579E+1<br>8     | 0.999           | 258778147<br>3      | 1               | 1.8347E+1<br>8 | 0.999           | 0.532            | 1                 | 162005095<br>6 | 1               | 1.91                | 1               |
| <i>cdtC</i>   | 2.4579E+1<br>8     | 0.999           | 258778147<br>3      | 1               | 1.8347E+1<br>8 | 0.999           | 57886525.14<br>0 | 1                 | 162005095<br>6 | 1               | 1.91                | 1               |

GEN: gentamicin, ERY: erythromycin, CHL: chloramphenicol, DC: doxycycline, TET: tetracycline, OR: Odds ratio <sup>a</sup> Indicates an association between antibiotics resistance and the associated-virulence gene. <sup>b</sup> Indicates an association between antimicrobial susceptibility and the associated-virulence gene. Antimicrobial resistance is defined as an OR > 1 and  $p < 0.05$ , and antimicrobial susceptibility is defined as an OR < 1 and  $p < 0.05$ .

**Table S5.** Reference ARGs sequences used in this study.

| ID       | ARG                       | Sequence (5'-3')                                                                                                                                                                                                                                                                                                                                                                                                                                                                                                                                                                                                                                                                                                                                                                                                                                                                                                                                                                                                                                                                                                                                                                                                                                                                                                                                                                                                                                                                                                                                                 |
|----------|---------------------------|------------------------------------------------------------------------------------------------------------------------------------------------------------------------------------------------------------------------------------------------------------------------------------------------------------------------------------------------------------------------------------------------------------------------------------------------------------------------------------------------------------------------------------------------------------------------------------------------------------------------------------------------------------------------------------------------------------------------------------------------------------------------------------------------------------------------------------------------------------------------------------------------------------------------------------------------------------------------------------------------------------------------------------------------------------------------------------------------------------------------------------------------------------------------------------------------------------------------------------------------------------------------------------------------------------------------------------------------------------------------------------------------------------------------------------------------------------------------------------------------------------------------------------------------------------------|
| M13771   | <i>aac(6')-aph(2'')_1</i> | ATGAATATAGTTGAAAATGAAATATGTATAAGAACCTTTAATAGATGATGATTTTCCTTTGATGTTAAAATGGTAACT<br>GATGAAAGAGTATTAGAATTTTATGGTGGTAGAGATAAAAAATATACATTAGAATCATTAAAAAACATTATACAG<br>AGCCTTGGAAGATGAAGTTTTAGAGTAATTATTGAATATAACAATGTTTCCTATTGGATATGGACAAATATATAAA<br>ATGTATGATGAGTTATATACTGATTATCATTATCCAAAACTGATGAGATAGTCTATGGTATGGATCAATTTATAGG<br>AGAGCCAAATTATTGGAGTAAAGGAATTGGTACAAGATATATTAAATTGATTTTTGAATTTTGAAAAAAGAAAGA<br>AATGCTAATGCAGTTATTTAGACCCTCATAAAAAATAATCCAAGAGCAATAAGGGCATACCAAAAAATCTGGTTTTA<br>GAATTATTGAAGATTTGCCAGAACATGAATTACACGAGGGCAAAAAAGAAGATTGTTATTTAATGGAATATAGATA<br>TGATGATAATGCCACAAATGTTAAGGCAATGAAATATTTAATTGAGCATTACTTTGATAATTTCAAAGTAGATAGTA<br>TTGAAATAATCGGTAGTGGTTATGATAGTGTGGCATATTTAGTTAATAATGAATACATTTTTAAACAAAATTTAGTA<br>CTAATAAGAAAAAAGGTTATGCAAAAGAAAAAGCAATATATAATTTTTTAAATACAAATTTAGAACTAATGTAAA<br>AATTCCTAATATTGAATATTCGTATATTAGTGATGAATTATCTATACTAGGTTATAAAGAAATTAAGGAACCTTTTT<br>AACACCAGAAATTTATTCTACTATGTCAGAAGAAGAACAAAATTTGTTAAAACGAGATATTGCCAGTTTTTAAAGAC<br>AAATGCACGTTTAGATTATACAGATATTAGTGAATGTACTATTGATAATAAACAAAATGTATTAGAAGAGTATATA<br>TTGTTGCGTGAAACTATTTATAATGATTTAACTGATATAGAAAAAGATTATATAGAAAGTTTTATGGAAAGACTAAA<br>TGCAACAACAGTTTTTGAGGGTAAAAAGTGTTTATGCCATAATGATTTTAGTTGTAATCATCTATTGTTAGATGGCAA<br>TAATAGATTAACCTGGAATAATTGATTTTGAGATTCTGGAATTATAGATGAATATTGTGATTTTATATACTTACTTGA<br>AGATAGTGAAGAAGAAATAGGAACAAATTTGGAGAAGATATATTAAGAATGTATGGAAATATAGATATTGAGAA<br>AGCAAAAGAATATCAAGATATAGTTGAAGAATATTATCCTATTGAAACTATTGTTTATGGAATTAATAATATTAAC<br>AGGAATTTATCGAAAAATGGTAGAAAAGAAATTTATAAAAGGACTTATAAAGATTGA |
| CP013733 | <i>aadE-Cc_1</i>          | ATGCAAAATCAAGATAAATTTTTAAAAACAATTTAAAAAATTAGCACTTTTAGATAAAAAATATACGCCTTGTTACACT<br>TGAAGGCTCAAGGGTTAATAAAAAAGCGAAGAAAGATAAATATCAAGACTATGATATTTCATTTTTGTGCCACTTG<br>ATAAAATGAAAGATTTTTTAGGGCTTAATGAAAAGCAAAATTTAACGAATGTAAAAACTTGCCAAAATGTATTTTA<br>GAGCTTGAAAAATCTTCATATTTTAAAAAAATTTTAATGCTTCAAATGCCTGAATGTATGGAGTTTTATCCACCTGAT<br>TTGCCACAAAATTGGATAAGTTTTTGTGCTTTTGAAGTGAGTGAGGCTTGATTAAACCATTATTCCTTTAGAA<br>GATTTGAAAAATTACTATGAATTTGAGCCTTTAAGCCAAGCGCTTTGGATAAAAAATGGGCTTTTACGCACACTATT<br>CCAAAAGCCCCATTTAGCATCACACACCTTAGCCAAAGAAGCTTTGATGATGTTTGCAATGAGTTTTATTTCTTTAT<br>AGTTGCTTAAAAAAAGCTCTTTAAGAAAGCAGTTATTTTGTCAAATCATTTGCTAAATCTTTGAGAAAAGCACTT<br>TTTGATTGCTTAGTTTTAAAATTGGCTTAAATTTTGGCTTTGAAATCTGGCTGGGAAAAGAATACACTAATATTTTA<br>GAATTTTATAGAAAGAAAAGAAGTAAAAATCATCTTAAATCTTTTAAACCCGCCACGCTAGAACACATCAAAAAA<br>GCAAGAAAAAAGCTTGAAATTTATTTTCAAAAAATGCTAAATTTGTAGCAAAAAAGAGTGATTTTAAAGCTTTTTCC<br>TTACCGAAAAAATGTGAAAAGGTATTGTAAAATTTTAGGAAAATTGTAA                                                                                                                                                                                                                                                                                                                                                                                                                                                                                                                                                                                            |

|          |                      |                                                                                                                                                                                                                                                                                                                                                                                                                                                                                                                                                                                                                                                                                                                                                                                                                                                                                                                                                                                                                             |
|----------|----------------------|-----------------------------------------------------------------------------------------------------------------------------------------------------------------------------------------------------------------------------------------------------------------------------------------------------------------------------------------------------------------------------------------------------------------------------------------------------------------------------------------------------------------------------------------------------------------------------------------------------------------------------------------------------------------------------------------------------------------------------------------------------------------------------------------------------------------------------------------------------------------------------------------------------------------------------------------------------------------------------------------------------------------------------|
| AF330699 | <i>ant(6)-Ia_1</i>   | <p>ATGAGATCAGAAAAAGAAATGATGGATTTAGTACTTTCTTTAGCAGAACAGGATGAACGTATTCTGAATTGTGACCC<br/> TTGAGGGGTCACGCGCAAATATTAATATACCTAAAGATGAATTTTCAGGATTATGATATTACATATTTTGTAAGTGAT<br/> ATAGAACCGTTTATATCTAATGATGACTGGCTTAATCAATTTGGGAATATAATAATGATGCAAAAAGCCGGAGGATAT<br/> GGAATTATTCCCACCTGAAGAAAAGGGATTTTCCTATCTTATGCTATTTGATGATTACAATAAAATTGATCTTACCTT<br/> ATTGCCCTTGGAAGAGTTAGATAAATTACCTAAAGGGCGATAAATTAATAAAAGGTTCTAATTGATAAAGATTGTAGA<br/> ATTAAAAGGGACATAGTTCCGACTGATATAGATTATCATGTAAGAAAGCCAAGCGCAAGGGAGTATGATGATTGCT<br/> GCAATGAATTTTGGAATGTAACACCTTATGTTATTAAGGATTGTGCCGTAAGGAAATTTTATTTGCTATTGATCATT<br/> TTAATCAGATTGTTTCGCCATGAGCTGCTGAGAATGATATCATGGAAGGTCGGCATCGAAACAGGCTTTAAATTAAGT<br/> GTAGGCAAGAACTATAAGTTTATTGAAAGGTATATATCCGAGGATTTGTGGGAGAACTTTTGTCCACCTACCGGAT<br/> GGATTCCTATGAAAACATATGGGAAGCATTATTTCTATGCCATCAATTGTTTCAGGGCGGTATCCGGTGAGGTGGCGG<br/> AAAGGCTTCATTATGCCTATCCGGAGTATGATAGGAATATAACAAAATATACCAGGGACATGTATAAAAAATACAC<br/> TGGTAAAACCGGCTGCCTGGATAGCACATATGCCGCTGATATAGAAGAGAGGCGGGAACAGTGA</p> |
| KF864551 | <i>ant(6)-Ia_3</i>   | <p>ATGAGATCAGAAAAGGAAGTTTATGATATTGTTTTGAATTTTGCAAAAACAGACAAACGCATTTCGCATGGTTACTTT<br/> GGAAGGATCTAGAACAAATACAAATATTCGCGCTGATGATTTTCAGGATTTTGATATTACTTTTTTTGTTACGGATAT<br/> GGACAGCTTCACAAGTGATGATAAATGGCTAGATATATTTGGTGAAAGGTTGATTCTGCAAAAGCCGGAAGATATG<br/> GAATTATTTCCAGCTGTAGAAAAGGGATTTTCATATTTAATGCTGTTTACTGATGATGTTAAGATAGATTAACTTTG<br/> CTGCCGCTGGAAGTATAGACGAGTATTTTACATGGGATAAACTGGTAAAGTTACTGTTGGATAAAGACAACCGTA<br/> TCGTAAAGCCGCCAATACCAACGGATATAGACTACCACTTGCAGAAGCCTACTCAAAGAATGTTTGACGATTGCTG<br/> TAATGAATTTTGGAATACTACAACATATGTAGTAAAGGGCTTATGCCGCAAAAGAAATTCCTTTTTGCTATTGACCATAT<br/> GAATGATATAGTACGAAAAGAATTGCTTCGCATGATTTCTGGCTGATTGGTATCAAACAGGGATTTTCATTTTCAGTTT<br/> GGGAAAAAACTATAAATTTATGAAGCAATATGTCCCAGAGGAATTGTGGGAACGACTTATGTCCACTTATAATATG<br/> GATTCCTATCCCCATATGTGGGAATCCTTTGAACAATGTATGGCATTGTTCCGGGAGGTTTCGTCAGAAGTGGCATG<br/> CCAGTTGGATTACCAGTATCCACTATATGATGAAAAAATCAGTAATTATGTGATTCCGGCAAAAGAAAAAATATGGC<br/> ATTGAAGATGATAACAAATAA</p>                                             |
| AY701528 | <i>aph(2'')-If_2</i> | <p>ATGGATATAAAAAAGATAATAGAAGAAAAATGCAATATAGTTGTTGATAGTATAAAAGTTGATTGGTGAGGGTTATG<br/> ACAGCAAAGCATACATTGTAAATAATGAATATGTTTTCAAAATCAAATTTAGTGCTAATAAGAAAAAAGGGTATGA<br/> AAAAGAAAAAGCAATATATGATTTTCTAAACAAAAAATTAATAACAAATATTAATAATACCAATATAGAATATTCA<br/> TATATAAGTGAAGAATTATCTATTTTAGGATATAAAGAAATTAAGGAACCTTTTTTAACACCAGAAATATATTTTGC<br/> CTTATCAAAAGAAAAGCAAGAATTATTAAGCAAGATATTGCTATGTTTTTAAGACAAATGCACGATTTAGATTATA<br/> GTGAAATAAGTTCATATACGATAGACAATAAACAAAATGTTTTAGAAGAATATCAATTACTTAAAGAAACAATATA<br/> TGATAGTCTTACTGATATTGAAAAACAATATGTAGAAGAATTTATGCAAAGATTAAATAGTACAACCTATATTTGATG<br/> GTAAAAAATGCTTATGCCATAATGATTTTAGTTGTAATCATTTATTACTTGATGATGAAAAATAGATTATGTGGTGTA<br/> TAGATTTTGGAGATTCTGGAATTATAGATGAATACTGTGATTTTCATATATTTGCTAGAAGATAGTGAAGAAGAAATT</p>                                                                                                                                                                                                                                                 |

|          |                                |                                                                                                                                                                                                                                                                                                                                                                                                                                                                                                                                                                                                                                                                                                                                                                                                                                                                     |
|----------|--------------------------------|---------------------------------------------------------------------------------------------------------------------------------------------------------------------------------------------------------------------------------------------------------------------------------------------------------------------------------------------------------------------------------------------------------------------------------------------------------------------------------------------------------------------------------------------------------------------------------------------------------------------------------------------------------------------------------------------------------------------------------------------------------------------------------------------------------------------------------------------------------------------|
|          |                                | GGCGTGTCTTTTGGAGAAGATATATTAAGATTATACGGAAATATTGATATTTCAAAGCAAAGGAATATCAAGATGT<br>TGTAACAATATTATCCAATAGAACTATTGTATATGGTATTAATAATAGACCTGATTTTATAGAAAAAGGTA<br>GAAAAGAGATTTATATAAGAACTCGCAAAGATGAAAAATTAAGGAAGTGA                                                                                                                                                                                                                                                                                                                                                                                                                                                                                                                                                                                                                                                       |
| M26832   | <i>aph(3')-III_1</i>           | ATGGCTAAAATGAGAATATCACCGGAATTGAAAAAACTGATCGAAAAATACCGCTGCGTAAAAGATACGGAAGGA<br>ATGTCTCCTGCTAAGGTATATAAGCTGGTGGGAGAAAATGAAAACCTATATTTAAAAATGACGGACAGCCGGTATA<br>AAGGGACCACCTATGATGTGGAACGGGAAAAGGACATGATGCTATGGCTGGAAGGAAAGCTGCCTGTTCCAAAGG<br>TCCTGCACTTTGAACGGCATGATGGCTGGAGCAATCTGCTCATGAGTGAGGCCGATGGCGTCCTTTGCTCGGAAGAG<br>TATGAAGATGAACAAAGCCCTGAAAAGATTATCGAGCTGTATGCGGAGTGCATCAGGCTCTTTCCTCCATCGACA<br>TATCGGATTGTCCCTATACGAATAGCTTAGACAGCCGCTTAGCCGAATTGGATTACTTACTGAATAACGATCTGGCC<br>GATGTGGATTGCGAAAACCTGGGAAGAAGACACTCCATTTAAAGATCCGCGCGAGCTGTATGATTTTTTAAAGACGG<br>AAAAGCCCGAAGAGGAACTTGTCTTTTCCACGGCGACCTGGGAGACAGCAACATCTTTGTGAAAGATGGCAAAGT<br>AAGTGGCTTTATTGATCTTGGGAGAAGCGGCAGGGCGGACAAGTGGTATGACATTGCCTTCTGCGTCCGGTTCGATCA<br>GGGAGGATATCGGGGAAGAACAGTATGTCGAGCTATTTTTTGACTTACTGGGGATCAAGCCTGATTGGGAGAAAAT<br>AAAATATTATATTTTACTGGATGAATTGTTTTAG |
| JQ396378 | <i>bla<sub>OXA-184</sub>_1</i> | TTGAAAAAATACTTTTACTTTTTAGTCTTTTTTACTCTTTTGCTTTGGCAAATGATAAATTAAGATTTTTTTAAAG<br>ACTACAATACAAGCGGAGTTTTTATAACTTTTGATGGAAAACATTATGCAAGTAATAATTTTAAAGAGCTAAAGA<br>ACCTTTTTCTCCTGCTTCGACTTTTAAATTTTTAATGCTTTAATTGCGCTTGATAATGGTGTAGTTAAAGATACAAAG<br>GAAATTTTTATCATTATAAGGGTGAAAAAGTATTTTTGCCCTCTTGGAACAAGATGCTAGTTTAAAGCTCAGCCATA<br>AAACGCTCTCAAGTGCCTGCTTTTAAAGAATTGGCAAGAAAAATAGGACTTAAAACCATGCAAGAAAGCTTAAATA<br>AACTTTCCTATGGAAATACAAAAATTTCAAAAATCGATACCTTTTGGTTGGATAATTCTTTACAAATTTCTGCAAAAA<br>ATCAAGCTGATTTGCTTTTTTAACTTTACAAAAATTCTTTACCTTTTTCCAAGAAAAGTCAAGAAGAAGTTAAAAAA<br>ATTATTCTTTTTAAAGAAGATAAAATCCAAAAATTTATGCTAAAACAGGTTTTAATGATGGTATAAATTTGGCTTG<br>GATTGTTGGATTTATAGAGAGTAAAAACAAAATTTTATCTTTTGCTTAAATGTTGATATAAAGAACATTAAAAATC<br>TTAAAATAAGAGAAGAATTGCTAGAAAAATATATTTATCTTTAAACTAA                                                              |
| JQ396379 | <i>bla<sub>OXA-185</sub>_1</i> | TTGAAAAAATACTTTTACTTTTTAGTCTTTTTTACTCTTTTGCTTTGGCAAATGATAAATTAAGATTTTTTTAAAG<br>ACTACAATACAAGCGGAGTTTTTATAACTTTTGATGGAAAACATTATGCAAGTAATAATTTTAAAGAGCTAAAGA<br>ACCTTTTTCTCCTGCTTCGACTTTTAAATTTTTAATGCTTTAATTGCGCTTGATAATGGTGTAGTTAAAGATACAAAG<br>GAAATTTTTATCATTATAAGGGTGAAAAAGTATTTTTGCCCTCTTGGAACAAGATGCTAGTTTAAAGCTCAGCCATA<br>AAACGCTCTCAAGTGCCTGCTTTTAAAGAATTGGCAAGAAAAATAGGACTTAAAACCATGCAAGAAAGCTTAAATA<br>AACTTTCCTATGGAAATACAAAAATTTCAAAAATCGATACCTTTTGGTTGGATAATTCTTTACAAATTTCTGCAAAAA<br>ATCAAGCTGATTTGCTTTTTTAACTTTACAAAAATTCTTTACCTTTTTCCAAGAAAAGTCAAGAAGAAGTTAAAAAA<br>ATTATTCTTTTTAAAGAAGATAAAATCCAAAAATTTATGCTAAAACAGGTTTTAATGATGGTATAAATTTGGCTTG                                                                                                                                                                                                   |

|                                         |                                                                                                                                                                                                                                                                                                                                                                                                                                                                                                                                                                                                                                                                                                                                                                                                                                                                   |
|-----------------------------------------|-------------------------------------------------------------------------------------------------------------------------------------------------------------------------------------------------------------------------------------------------------------------------------------------------------------------------------------------------------------------------------------------------------------------------------------------------------------------------------------------------------------------------------------------------------------------------------------------------------------------------------------------------------------------------------------------------------------------------------------------------------------------------------------------------------------------------------------------------------------------|
|                                         | <p>GATTGTTGGATTTATAGAGAGTAAAAACAAAATTTTATCTTTTGCCTTAAATGTTGATATAAAGAACATTAAAAATA<br/>TTAAAATAAGAGAAGAATTGCTAGAAAAATATATTTATTCTTTAACTAA</p>                                                                                                                                                                                                                                                                                                                                                                                                                                                                                                                                                                                                                                                                                                                        |
| CP013032 <i>bla<sub>OXA-193_1</sub></i> | <p>ATGAAAAAATAACTTTATTTTTGCTTTTCTTAAATTTAGTGTTTGGGCAAGATAAGATATTAAATAATTGGTTTAAA<br/>GAGTATAATACAAGCGGCACCTTTTGTTTTTATGATGGAAAAACTTGGGCGAGTAACGACTTTTCAAGGGCTATGGA<br/>GACTTTCTCTCCCGCTTCCACTTTTAAAATTTTAAATGCTCTAATTGCACCTGATAGTGGTGTGATAAAAACTAAAAA<br/>AGAAATTTTTATCACTATAGAGGTGAAAAAGTATTTTTATCTTCTTGGGCGCAAGATATGAATTTAAGTTCAGCTAT<br/>AAAATATTCTAATGTTCTTGCTTTTAAAGAAGTGGCAAGAAGAATTGGTATCAAAACTATGCAAGAATATTTAAACA<br/>AGCTTCATTATGGTAATGCTAAAATTTCCAAGATCGATACTTTTTGGCTTGACAACCTCACTAAAAATAAGCGCTAAA<br/>GAACAAGCAATTTTGCTTTTATAGACTTTTACAAAATAGCTTACCTTTTTCTCAAGAAGCAATGAATAGTGTTAAGGA<br/>AATGATTTATTTAAAAAATATGGAAAATTTAGAGCTTTTTGGAAAAACAGGTTTTAATGATGAGCAAAAAAATTGCTT<br/>GGATTGTAGGTTTTGTGTATTTAAAAGATGAAAATAAATATAAGGCTTTCGCGCTAAATTTAGATATTGATAAATTTG<br/>AAGATTTATATAAAAGAGAAAAAATTTTAGAAAAATATTTAGATGAACTTGTAaaaaaaAGTTAAAAATGATGGCTA<br/>G</p> |
| KR061500 <i>bla<sub>OXA-465_1</sub></i> | <p>TTGAAAAAATACTTTTACTTTTTAGTCTTTTTACTCTTTTGTCTTTGGCAAATGATAAATTAAAAGATTTTTTTAAAG<br/>ACTACAATACAAGCGGAGTTTTTATAACTTTTGATGGAAAACATTATGCAAGTAATGATTTTAAAAGAGCTAAAGA<br/>ACCTTTTTCTCCTGCTTCGACTTTTAAAATTTTAAATGCTTTAATTGCGCTTGATAACGGTGTAGTTAAAGATACAAAG<br/>GAAATTTTTATCATTATAAGGGTGAAAAAGTATTTTTGCCTTCTTGGAACAAGATGCTAGTTTAAAGCTCAGCCATA<br/>AAACGCTCTCAAGTGCCTGCTTTTAAAGAATTGGCAAGAAAAATAGGACTTAAAACCATGCAAGAAAGCTTAAATA<br/>AACTTTCCTATGGAAATGCAAAAATTTCAAAAATCGATACCTTTTGGTTGGATAATTCTTTACAAATTTCTGCAAAAA<br/>ATCAAGCTGATTTGCTTTTTAACTTTTCAAAAATTTCTTTACCTTTTTCCAAGAAAAGTCAAGAAGAAAGTTAAAAAA<br/>ATTATTCTTTTTAAAGAAGATAAAATCCAAAAAATTTATGCTAAAACAGGTTTTAATGATGGTATAAATTTGGCTTG<br/>GATTGTCGGATTTATAGAGAGTAAAAACAAAATTTTATCTTTTGCCTTAAATGTTGATATAAAGGACATTAAAAATA<br/>TTAAAATAAGAGAAGAATTGCTAGAAAAATATATTTATTCTTTAACTAA</p>                                     |
| CP013733 <i>bla<sub>OXA-489_1</sub></i> | <p>ATGAAAAAATAACTTTATTTTTACTTTTCTTAAATTTAGTGTTTGGGCAAGATAAGATATTAAATAATTGGTTTAAA<br/>GAGTATAATACAAGCGGCACCTTTTGTTTTTATGATGGAAAAACTTGGGCGAGTAACGACTTTTCAAGGGCTATGGA<br/>GACTTTCTCTCCCGCTTCCACTTTTAAAATTTTAAATGCTCTAATTGCACCTGATAGTGGTGTGATAAAAACTAAAAA<br/>AGAAATTTTTATCACTATAGAGGTGAAAAAGTATTTTTATCTTCTTGGGCGCAAGATATGAATTTAAGTTCAGCTAT<br/>AAAATATTCTAATGTTCTTGCTTTTAAAGAAGTGGCAAGAAGAATTGGTATCAAAACTATGCAAGAATATTTAGACA<br/>AGCTTCATTATGGTAATGCTAAAATTTCCAAGATCGATACTTTTTGGCTTGACAACCTCACTAAAAATAAGCGCTAAA<br/>GAACAAGCAATTTTGCTTTTATAGACTTTTACAAAATAGCTTACCTTTTTCTCAAGAAGCAATGAATAGTGTTAAGGA<br/>AATGATTTATTTAAAAAATATGGAAAATTTAGAGCTTTTTGGAAAAACAGGTTTTAATGATGAGCAAAAAAATTGCTT<br/>GGATTGTAGGTTTTGTGTATTTAAAAGATGAAAATAAATATAAGGCTTTCGCGCTAAATTTAGATATTGATAAATTTG</p>                                                                                         |

|          |                  |                                                                                                                                                                                                                                                                                                                                                                                                                                                                                                                                                                                                                                                                                                                                                                                                                                                                                                                                                                                                                      |
|----------|------------------|----------------------------------------------------------------------------------------------------------------------------------------------------------------------------------------------------------------------------------------------------------------------------------------------------------------------------------------------------------------------------------------------------------------------------------------------------------------------------------------------------------------------------------------------------------------------------------------------------------------------------------------------------------------------------------------------------------------------------------------------------------------------------------------------------------------------------------------------------------------------------------------------------------------------------------------------------------------------------------------------------------------------|
|          |                  | AAGATTTATATAAAAGAGAAAAAATTTTAGAAAAATATTTAGATGAACTTGTAaaaaaAGTTAAAAATGATGGCTA                                                                                                                                                                                                                                                                                                                                                                                                                                                                                                                                                                                                                                                                                                                                                                                                                                                                                                                                         |
|          |                  | G                                                                                                                                                                                                                                                                                                                                                                                                                                                                                                                                                                                                                                                                                                                                                                                                                                                                                                                                                                                                                    |
| M35190   | <i>cat_2</i>     | ATGCAATTCACAAAGATTGATATAAAATAATTGGACACGAAAAGAGTATTTGACCACTATTTTGGCAATACGCCCTG<br>CACATATAGTATGACGGTAAAACCTCGATATTTCTAAGTTGAAAAAGGATGGAAAAAAGTTATACCCAACCTCTTTAT<br>ATGGAGTTACAACGATCATCAATCGACATGAAGAGTTCAGGACCGCATTAGATGAAAACGGACAGGTAGGCGTTTT<br>TTCAGAAATGCTGCCTTGCTACACAGTTTTTCATAAGGAAACTGAAACCTTTTCGAGTATTTGGACTGAGTTTACAGC<br>AGACTATACTGAGTTTCTTCAGAACTATCAAAAGGATATAGACGCTTTTGGTGAACGAATGGGAATGTCCGCAAAG<br>CCTAATCCTCCGGAaaACACTTTCCCTGTTTCTATGATACCGTGGACAAGCTTTGAAGGCTTTAACTTAAATCTAAAA<br>AAAGGATATGACTATCTACTGCCGATATTTACGTTTGGGAAGTATTATGAGGAGGGCGGAAAAATACTATATTCCCTT<br>ATCGATTCAAGTGCATCATGCCGTTTGTGACGGCTTTCATGTTTGCCGTTTTTTGGATGAATTACAAGACTTGCTGAAT                                                                                                                                                                                                                                                                                                                                             |
|          |                  | AAATAA                                                                                                                                                                                                                                                                                                                                                                                                                                                                                                                                                                                                                                                                                                                                                                                                                                                                                                                                                                                                               |
| X66468   | <i>erm(B)_18</i> | ATGTATCACTTCAGGAGTGATTACATGAACAAAAATATAAAATATTCTCAAAACTTTTTAACGAATGAAAAGGTACT<br>CAACCAAATAAATAAAACAATTGAATTTAAAAGAAACCGATACCGTTTACGAAATTGGAACAGGTAAAGGGCATTT<br>AACGACGAAACTGGCTAAAATAAGTAAACAGGTAACGTCTATTGAATTAGACAGTCATCTATTCAACTTATCGTCA<br>GAAAAATTAAACTGAACATTCGTGTCACTTTAATTCACCAAGATATTCTACAGTTTCAATTCCTAACAAACAGAG<br>GTATAAAATTGTTGGGAATATTCCTTACCATTTAAGCACACAAATTATTAaaaaaAGTGGTTTTTGAAAGCCATGCCGT<br>CTGACATCTATCTGATTGTTGAAGAAGGATTCTACAAGCGTACCTTGGATATTCACCGAACACTAGGGTTGCTCTTG<br>CACACTCAAGTCTCGATTGAGCAATTGCTTAAGCTGCCAGCGGAATGCTTTCATCCTAAACCAAAAGTAAACAGTGT<br>CTTAATAAAACTTACCCGCCATACCACAGATGTTCCAGATAAATATTGGAAGCTATATACGTACTTTGTTTCAAAT<br>GGGTCAATCGAGAATATCGTCAACTGTTTACTAAAAATCAGTTTCATCAAGCAATGAAACACGCCAAAGTAAACAA<br>TTTAAGTACCGTTACTTATGAGCAAGTATTGTCTATTTTAAATAGTTATCTATTATTTAACGGGAGGAAATAA                                                                                                                                                                                       |
| AJ549214 | <i>fexA_1</i>    | AATGAAAAAGGATAGTAAATCTAAAGAAATGATTCAATCTGAAAAAAGGGGTCTACTAGGCTTTTAATGATGGTA<br>CTCTCCCTATCTGTACTTGTAGGTGCAATTACGGCTGATTTAGTCAATCCCGTACTTCCACTAATAAGCAAAGATTTA<br>GAAGCTTCGAAATCTCAAGTGAGTTGGATAGTTAGTGGTATTGCACATTGTTCTTGCGATTGGAGTCCGATTTATGGT<br>CGAATCTCAGACTTTTTTGAGTTACGAAAGCTATATATCTTTGCCATTATGATTCTGGCAAGTGGTAGTCTTTTATGTG<br>CAATTGCCCCGAACCTCCCATTGTTGGTTTTGGGAAGAATGGTTCAGGGTGCTGGGATGTCCGCAATTCCAGTTCTAT<br>CAATCATTGCAATTTTCGAAGGTTTTCCACAAAGGAAAACGTGGGGGAGCTTTGGGAATTATCGCAGGAAGTATTGGT<br>GTTGGAACTGCTGCTGGTCCAATATTTGGTGGAGTAGTTGGTCAATATTTAGGGTGGAATGCCTTGTTTTGGTTCACA<br>TTTTTGTTAGCCATTATGATTGTTATTGGTGCCTACTACGCGTTACCGACAATTAAACCGGCAGAATCCGTAGGAAGC<br>AATAAGAACTTTGATTTCAATTGGTGGTTTATTCTCGGCCTCACAGTAGGATTACTCCTTTTTGGCATCACTCAAGGA<br>GAAACTTCTGGTTTTTCTTCGTTCTCATCGTTAACTAGCCTAATTGGTTCGTGTGTAGCTTTGGTGGGATTTATTTGGAG<br>AATTGTTACCGCAGAAAATCCATTTGTACCACCTGTCCTGTTCAATAACAAGGATTATGTCAATACGGTCATAATTG<br>CATTTTTTTCGATGTTTGCTTATTTTCGCTGTTCTTGTGTTTCGTCCTTACTAGTCGTTGAGGTGAATGGACTCTCTCT |



|        |                 |                                                                                                                                                                                                                                                                                                                                                                                                                                                                                                                                                                                                                                                                                                                                                                                                                                                                                                                                                                                                                                                                                                                                                                                                                                                                                                                                                                                                                                                                                                                                         |
|--------|-----------------|-----------------------------------------------------------------------------------------------------------------------------------------------------------------------------------------------------------------------------------------------------------------------------------------------------------------------------------------------------------------------------------------------------------------------------------------------------------------------------------------------------------------------------------------------------------------------------------------------------------------------------------------------------------------------------------------------------------------------------------------------------------------------------------------------------------------------------------------------------------------------------------------------------------------------------------------------------------------------------------------------------------------------------------------------------------------------------------------------------------------------------------------------------------------------------------------------------------------------------------------------------------------------------------------------------------------------------------------------------------------------------------------------------------------------------------------------------------------------------------------------------------------------------------------|
| M29725 | <i>tet(L)_2</i> | <p>GGACAGGCTGGAATGATATTGTTGCCAGGTGGTGTGGCTGTTGCAATCTTATCTCCCTTCGTTGGCCGTCTTTCTGAT<br/> CGATTTGGGGATAAACGTCTGATAATTACTGGGATGACTCTGATGGGGCTGTCTACCTTATTCTTGTCCACCTATGCA<br/> TCTGGTGCCTTACCTCTGTTAGTTTCCGTGGGGGTCCTCGGAGTAGGGATTGCTTTTGCATTACGAATTCTCCCGCA<br/> AATAACGCCGCAGTAAGTGCACCTCGATGCAGACAAGGTTGGTGTCCGAATGGGGATTTTCCAAGGTGCTTTGTACCT<br/> TGGAGCAGGAAGTGGAGCAGGTATGATTGGAGCATTATTATCCGCTCGACGTGATGCTACTGAGCCGATAAATCCA<br/> TTATATATATTGGACGCTATGTCCTACTCAGATGCGTTCCTTGCAGCTACAGGGGCAATACTCATTGCCTTAATAGCT<br/> GGATTAGGTTTAAAAAAGCGTGGGTAA</p>                                                                                                                                                                                                                                                                                                                                                                                                                                                                                                                                                                                                                                                                                                                                                                                                                                                                                                                                                                                 |
| M29725 | <i>tet(L)_2</i> | <p>GTGAATACATCCTATTCACAATCGAATTTACGACACAACCAAATTTTAATTTGGCTTTGCATTTTATCTTTTTTTAGCG<br/> TATTAAATGAAATGGTTTTGAACGTCTCATTACCTGATATTGCAAATGATTTTAATAAACCACCTGCGAGTACAAAC<br/> TGGGTGAACACAGCCTTTATGTTAACCTTTTCCATTGGAACAGCTGTATATGGAAAGCTATCTGATCAATTAGGCATC<br/> AAAAGTTACTCCTATTTGGAATTATAATAAATTGTTTCGGGTCGGTAATTGGGTTTGTGGCCATTCTTTCTTTTCT<br/> TACTTATTATGGCTCGTTTTATTCAAGGGGCTGGTGCAGCTGCATTTCCAGCACTCGTAATGGTTGTAGTTGCGCGCT<br/> ATATTCCAAAGGAAAATAGGGGTAAAGCATTGGTCTTATTGGATCGATAGTAGCCATGGGAGAAGGAGTCGGTCC<br/> AGCGATTGGTGAATGATAGCCATTATATTCAATTGGTCCTATCTTCTACTCATTCCCTATGATAACAATTATCACTGTT<br/> CCGTTTCTTATGAAATTATTAAAGAAAGAAGTAAGGATAAAAGGTCATTTTGATATCAAAGGAATTATACTAATGTC<br/> TGTAGGCATTGTATTTTTTATGTTGTTTACAACATCATATAGCATTTCCTTTCTTATCGTTAGCGTGCTGTCATTCCCTGA<br/> TATTTGTAAAACATATCAGGAAAGTAACAGATCCTTTTGTTGATCCCGGATTAGGGAAAAATATACCTTTTATGATT<br/> GGAGTTCTTTGTGGGGGAATTATATTTGGAACAGTAGCAGGGTTTGCTCTATGGTTCCTTATATGATGAAAGATGTT<br/> CACCAGCTAAGTACTGCCGAAATCGGAAGTGTAATTATTTCCCTGGAACAATGAGTGTCAATTATTTCCGGCTACATT<br/> GGTGGGATACTTGTTGATAGAAGAGGTCCTTTATACGTGTTAAACATCGGAGTTACATTTCTTCTGTTAGCTTTTTAA<br/> CTGCTTCCTTTCTTTTAGAAACAACATCATGGTTCATGACAATTATAATCGTATTTGTTTTAGGTGGGCTTTCGTTTAC<br/> CAAAACAGTTATATCAACAATTGTTTCAAGTAGCTTGAAACAGCAGGAAGCTGGTGCTGGAATGAGTTTGCTTAAC<br/> TTACCAGCTTTTTATCAGAGGGAACAGGTATTGCAATTGTAGGTGGTTTATTATCCATACCCTTACTTGATCAAAGGT<br/> TGTTACCTATGGAAGTTGATCAGTCAACTTATCTGTATAGTAATTTGTTATTACTTTTTTCAGGAATCATTGTCATTAG<br/> TTGGCTGGTTACCTTGAATGTATATAAACATTCTCAAAGGGATTCTAA</p> |
| M18896 | <i>tet(O)_1</i> | <p>ATGAAAATAATTAACCTTAGGCATTCTGGCTCACGTTGACGCAGGAAAGACAACATTAACGGAAAGTTTATTGTATA<br/> CCAGTGGTGCAATTGCAGAACTAGGGAGCGTAGATGAAGGCACAACAAGGACAGATACAATGAATTTGGAGCGTC<br/> AAAGGGGAATCACTATCCAGACAGCAGTGACATCTTTTCACTGGGAGGATGTAAAAGTCAACATTATAGATACGCC<br/> AGGCCATATGGATTTTTTGGCGGAAGTATACCGTCTTTATCCGTATTAGACGGAGCAGTATTATTAGTTTCTGCAAA<br/> GGATGGCATAACAGGCACAGACCCGTATACTGTTTCATGCACTACAGATAATGAAGATTCCGACAATTTTTTTCATCA<br/> ATAAAATTGACCAAGAGGGGATTGATTTGCCAATGGTATATCGGGAAATGAAAGCAAAGCTTTCTTCGGAAATTAT<br/> AGTGAAGCAAAGGTTGGGCAGCATCCCCATATAAATGTAACGGACAATGACGATATGGAACAGTGGGATGCGGT<br/> AATTATGGGAAACGATGAACATTAGAGAAATATATGTCAGGGAAACCGTTTAAAATGTCAGAACTGGAACAGGA</p>                                                                                                                                                                                                                                                                                                                                                                                                                                                                                                                                                                                                                                                                                                                                                                                                                                                        |

---

AGAAAACAGGAGATTCCAAAACGGAACGTTATTTCCCGTTTATCACGGAAGCGCTAAAAACAATCTGGGGACTCGG  
CAGCTTATAGAAGTAATTGCCAGTAAATTTTATTCATCAACGCCTGAAGGTCAATCTGAACTATGCGGGCAGGTTTT  
TAAGATTGAATATTCAGAGAAAAGGCGGCGTTTTGTTTATGTGCGTATATATAGCGGAACATTGCATTTGAGGGATG  
TTATTAGAATATCTGAAAAAGAGAAAATAAAAATCACAGAGATGTATGTTCCGACAAACGGTGAATTATATTCATC  
CGATACAGCCTGCTCTGGTGATATTGTAATTTTACCAAATGATGTTTTGCAGCTAAACAGTATTTTGGGGAACGAAA  
TACTGTTGCCGCAGAGAAAATTTATTGAAAATCCTCTCCCTATGATCCAAACAACGATTGCAGTAAAGAAATCTGA  
ACAGCGGGAATATTGCTTGGGGCACTTACAGAAATTCAGATTGCGACCCTCTTTTAAAAATATTATGTGGATACTA  
CAACGCATGAGATTATACTTTCTTTTTTGGGGAATGTGCAGATGGAAGTCATTTGTGCCATCCTTGAGGAAAAATAT  
CATGTGGAGGCAGAAATAAAAAGAGCCTACTGTTATATATATGGAAAGACCGCTTAGAAAAGCAGAATATACCATC  
CACATAGAAGTCCCGCCAAATCCTTTCTGGGCTTCTGTGCGGTTGTCCATAGAGCCGCTCCCTATTGGAAGCGGAGT  
GCAGTATGAAAGCAGAGTTTCACTTGGATATTTAAATCAATCGTTCCAAAATGCGGTTATGGAGGGGGTTCTTTATG  
CCTGCGAGCAGGGGCTGTATGGATGGAAAAGTGACAGACTGTAAAATCTGTTTTGAATATGGATTGTATTATAGTCTT  
GTAAGTACCCCCGCAGACTTTTCGGCTGCTTTCCCTATCGTATTGGAGCAGGCTTTAAAAAAGCAGGGACAGAAC  
TATTAGAGCCATATCTCCACTTTGAAATTTATGCACCGCAGGAATATCTCTCACGGGCGTATCATGATGCTCCAAGG  
TATTGTGCAGATATTGTAAGTACTCAGATAAAGAATGACGAGGTCAATCTGAAAGGAGAAAATCCCTGCTAGATGTA  
TTCAAGAATACAGGAACGATTAACTTATTTACAAAATGGGCAGGGAGTCTGCTTGACAGAGTTAAAAGGATACCA  
GCCAGCTATTGGTAAATTTATTTGCCAACCCCGCGCCCGAATAGCCGTATAGATAAGGTTCCGCATATGTTCCACA  
AGTTAGCTTAA

---

M20925     *tet(O)\_2*

ATGAAAATAATTAACCTTAGGCATTCTGGCTCACGTTGACGCAGGAAAAGACAACATTAACGGAGAGTTTATTGTATA  
CCAGTGGTGCAATTGCAGAACCAGGGAGCGTAGATAAAGGCACAACAAGGACAGATACAATGAATTTGGAGCGTC  
AAAGGGGAATCACTATCCAGACAGCAGTGACATCTTTTCAGTGGGAGGATGTAAAAGTCAACATTATAGATACGCC  
AGGCCATATGGATTTTTTGGCGGAAGTATACCGTCTTTATCCGTATTAGACGGAGCAGTATTATTAGTTTCTGCAA  
GGATGGCATAACAGGCACAGACCCGTATACTGTTTCATGCACTACAGACAATGAAGATTCCGACAATTTTTTTCATCA  
ATAAAATTGACCAAGAGGGGATTGATTTGCCAATGGTATATCGAGAAATGAAAGCAAAGCTTTCTTCGGAAATTAT  
AGTGAAGCAAAAGGTTGGGCAGCATCCCCATATAAATGTAACAGACAATGACGATATGGAACAGTGGGATACGGT  
AATTATGGGAAACGATGAACTATTAGAGAAATATATGTCAGGGAAACCGTTTAAAATGTCAGAACTGGAACAGGA  
AGAAAACAGGAGATTCCAAAACGGAACGTTATTTCCCGTTTATCACGGAAGCGCTAAAAACAATCTGGGGATTCCG  
CAGCTTATAGAAGTGATTGCCAGTAAATTTTATTCATCAACGCCTGAAGGTCAATCTGAACTATGCGGGCAGGTTTT  
TAAGATTGAATATTCAGAGAAAAGGCGGCGTTTTGTTTATGTGCGTATATATAGCGGAACATTGCATTTGAGGGATG  
TTATTAGAATATCTGAAAAAGAGAAAATAAAAATCACAGAGATGTGTGTTCCGACAAACGGTGAATTATATTCATC  
CGATACAGCCTGCTCTGGTGATATTGTAATTTTACCAAATGATGTTTTGCAGCTAAACAGTATTTTGGGGAACGAAA  
TACTGTTGCCGCAGAGAAAATTTATTGAAAATCCTCTCCCTATGCTCCAAACAACGATTGCAGTAAAGAAATCTGAA  
CAGCGGGAATATTGCTTGGGGCACTTACAGAAATTCAGATGGCGACCCTCTTTTAAAAATATTATGTGGATACTAC  
AACGCATGAGATTATACTTTCTTTTTTGGGGAATGTGCAGATGGAAGTCATTTGTGCCATCCTTGAGGAAAAATATC

---

---

ATGTGGAGGCAGAAATAAAAGAGCCTACTGTTATATATATGGAAAGACCGCTTAGAAAAGCAGAATATACCATCC  
ACATAGAAGTCCCGCCAAATCCTTTCTGGGCTTCTGTCGGGTTGTCCATAGAGCCGCTCCCTATTGGAAGCGGAGTG  
CAGTATGAAAGCAGAGTTTCACTTGGATATTTAAATCAATCGTTCCAAAATGCGGTTATGGAGGGGGTTCTTTATGG  
CTGCGAGCAGGGGCTGTATGGATGGAAAGTGACAGACTGTAAAATCTGTTTTGAATATGGATTGTATTATAGTCCTG  
TAAGTACCCCCGCAGACTTTTCGGCTGCTTTCCCCTATCGTATTGGAGCAGGCTTTAAAAAAGCAGGGACAGAACT  
ATTAGAGCCATATCTCCACTTTGAAATTTATGCACCGCAGGAATATCTCTCACGGGCGTATCATGATGCTCCAAGGT  
ATTGTGCAGATATTGTAAGTACTCAGATAAAGAATGACGAGGTCATTCTGAAAGGAGAAATCCCTGCTAGATGTAT  
TCAAGAATACAGGAACGATTAACTTATTTACAAATGGGCAGGGAGTCTGCTTGACAGAGTTAAAAGGATACCAG  
CCAGCTATTGGTAAATTTATTTGCCAACCCCGCCGCCGAATAGCCGTATAGATAAGGTTCCGCATATGTTCCACAA  
GTTAGCTTAA

---

All reference sequences were extracted from resfinder database on webpage [https://bitbucket.org/genomicepidemiology/resfinder\\_db](https://bitbucket.org/genomicepidemiology/resfinder_db) (updated before May 27 2024).

**Table S6.** The interpretative standards for antibiotic resistance used in this study.

| Antibiotics                  | <i>C.jejuni/C. coli</i> |              |           |
|------------------------------|-------------------------|--------------|-----------|
|                              | Susceptible             | Intermediate | Resistant |
| Ciprofloxacin <sup>a</sup>   | ≤1                      | 2            | ≥4        |
| Erythromycin <sup>a</sup>    | ≤8                      | 16           | ≥32       |
| Doxycycline <sup>a</sup>     | ≤2                      | 4            | ≥8        |
| Tetracycline <sup>a</sup>    | ≤4                      | 8            | ≥16       |
| Chloramphenicol <sup>b</sup> | ≤16                     | -            | ≥32       |
| Gentamicin <sup>b</sup>      | ≤2                      | -            | ≥4        |

<sup>a</sup> From Clinical and Laboratory Standard Institute (CLSI, M45-A3) <sup>b</sup> From EUCAST epidemiological cut-off values (ECOFFs), with wild type as susceptible and non-wild type as resistant. ([https://www.eucast.org/mic\\_and\\_zone\\_distributions\\_and\\_ecoffs](https://www.eucast.org/mic_and_zone_distributions_and_ecoffs), accessed on 27 May 2024).
